# Supplementary material
Source: publisher figshare collection journal article supplement (https://acs.figshare.com/ndownloader/files/12767756)
Supplement: Supplementary file 1 [file 12767756]

# Supporting Information

## Near- and Mid-IR Gas-Phase Absorption Spectra of $\text{H}_2\text{@C}_{60}^+ - \text{He}$ .

Dmitry V. Strel'nikov,<sup>\*,†</sup> Juraj Jašík,<sup>‡</sup> Dieter Gerlich,<sup>¶</sup> Michihisa Murata,<sup>§</sup>  
Yasujiro Murata,<sup>§</sup> Koichi Komatsu,<sup>§</sup> and Jana Roithová<sup>‡</sup>

<sup>†</sup>*Karlsruhe Institute of Technology (KIT), Division of Physical Chemistry of Microscopic  
Systems, Karlsruhe, Germany*

<sup>‡</sup>*Department of Organic Chemistry, Faculty of Science, Charles University in Prague,  
12843 Prague 2, Czech Republic*

<sup>¶</sup>*Department of Physics, University of Technology, 09107 Chemnitz, Germany*

<sup>§</sup>*Institute for Chemical Research, Kyoto University, Kyoto 611-0011, Japan*

E-mail: dmitry.strel'nikov@kit.edu

# Contents

Page

|       |                                                                                                                                              |
|-------|----------------------------------------------------------------------------------------------------------------------------------------------|
| S3-S4 | Comparison of our near-IR data to the Campbell and Maier <sup>1</sup> , Campbell et al. <sup>2</sup>                                         |
| S5    | DFT IR spectra of H <sub>2</sub> @C <sub>60</sub> <sup>+</sup> for different H <sub>2</sub> orientations inside C <sub>60</sub> <sup>+</sup> |
| S6    | TDDFT spectra of H <sub>2</sub> @C <sub>60</sub> <sup>+</sup> for different H <sub>2</sub> orientations inside C <sub>60</sub> <sup>+</sup>  |

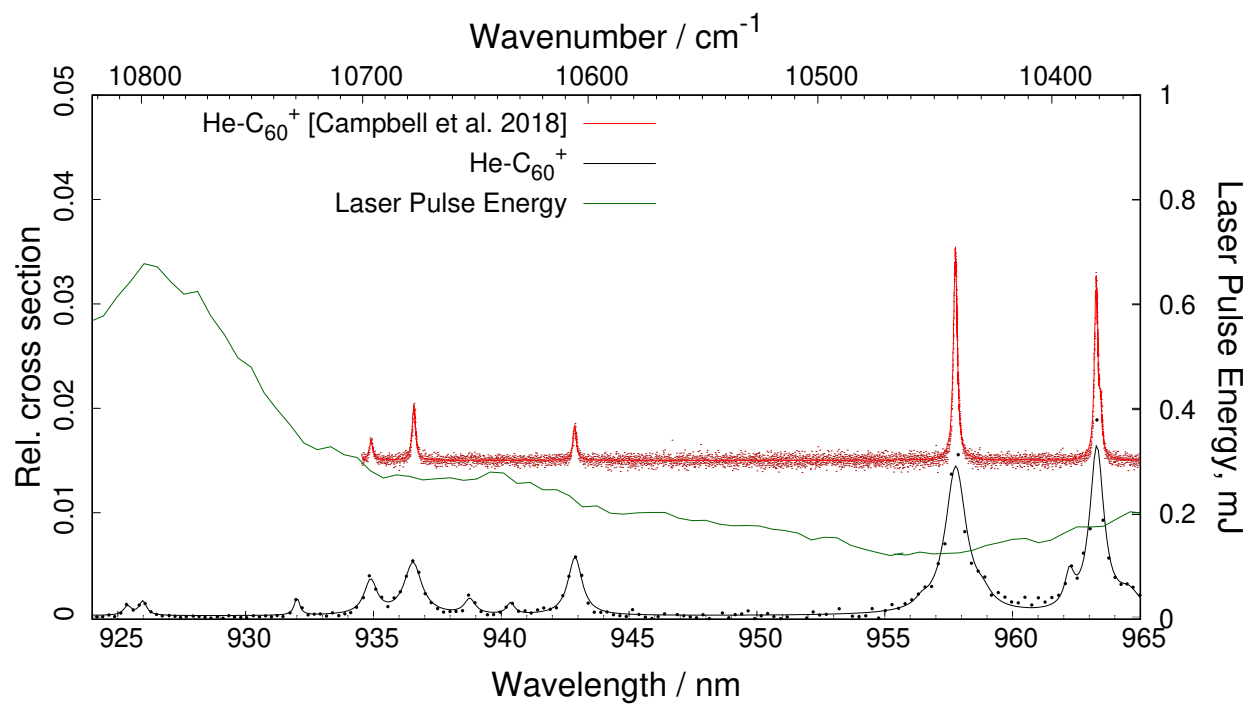

Figure S1: Comparison of our near-IR data to the Campbell and Maier<sup>1</sup>. Here the vacuum wavelengths were converted to the air wavelengths, used in Campbell and Maier<sup>1</sup>. The data points from Campbell and Maier<sup>1</sup> have been digitized using *WebPlotDigitizer*.<sup>3</sup>

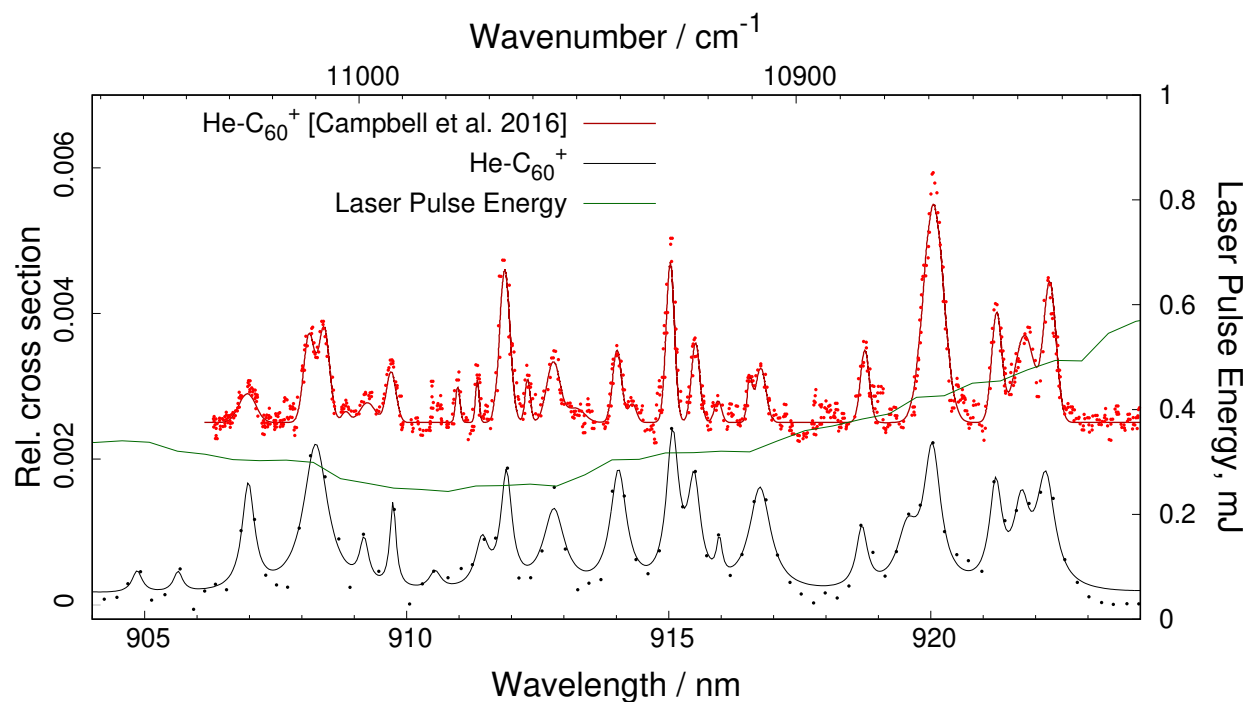

Figure S2: Comparison of our near-IR data to the Campbell et al.<sup>2</sup>. Here the vacuum wavelengths were converted to the air wavelengths used in Campbell et al.<sup>2</sup>. The data points from Campbell et al.<sup>2</sup> have been digitized using *WebPlotDigitizer*.<sup>3</sup>

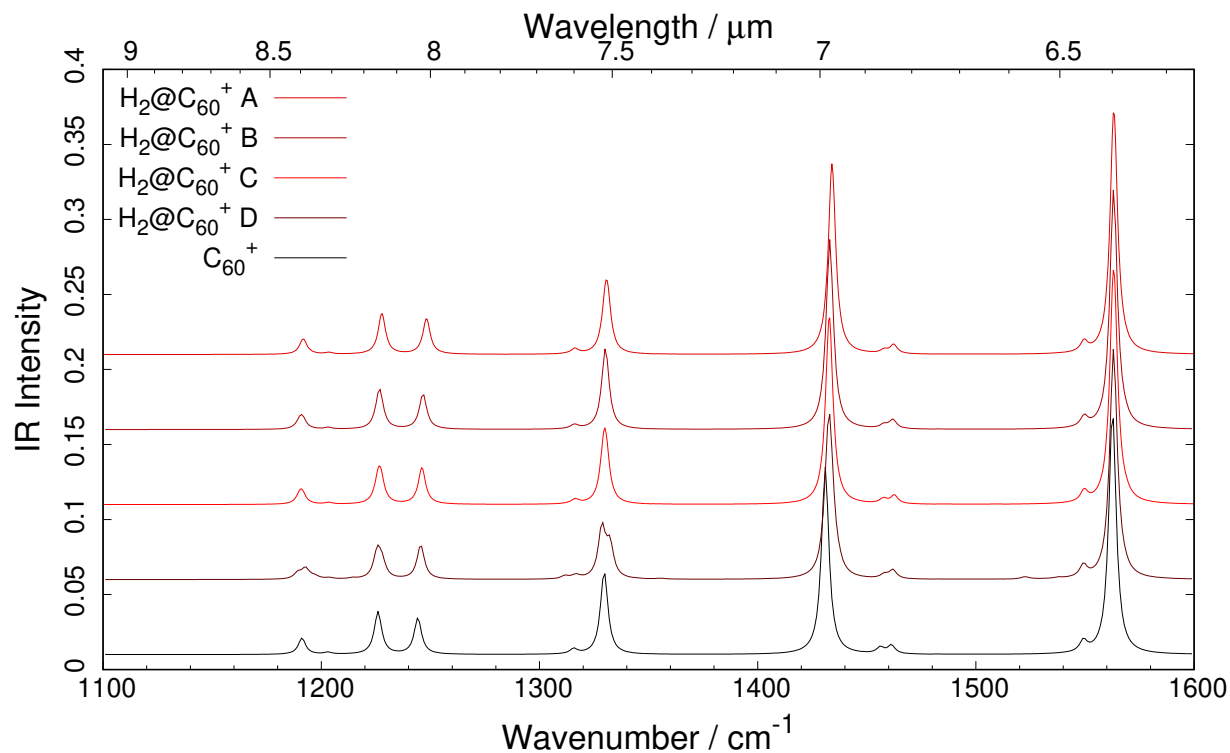

Figure S3: Calculated harmonic frequencies (RI-DFT BP86/def2-SVP, D3 dispersion correction<sup>4</sup>) of isomers with different H<sub>2</sub> orientations inside C<sub>60</sub><sup>+</sup>. The calculated spectrum was broadened by Lorentzian functions with a 4 cm<sup>-1</sup> FWHM. The potential energy surface for H<sub>2</sub> inside C<sub>60</sub><sup>+</sup> is very shallow, hindering a proper geometry optimization. Therefore, we took few H<sub>2</sub>@C<sub>60</sub><sup>+</sup> isomers, which are not the real ground states due to the presence of imaginary frequencies, corresponding to H<sub>2</sub> motion inside C<sub>60</sub><sup>+</sup>. Nevertheless, the applied level of theory does not predict considerable influence of H<sub>2</sub> on the C-C stretching (tangential) vibrational modes.

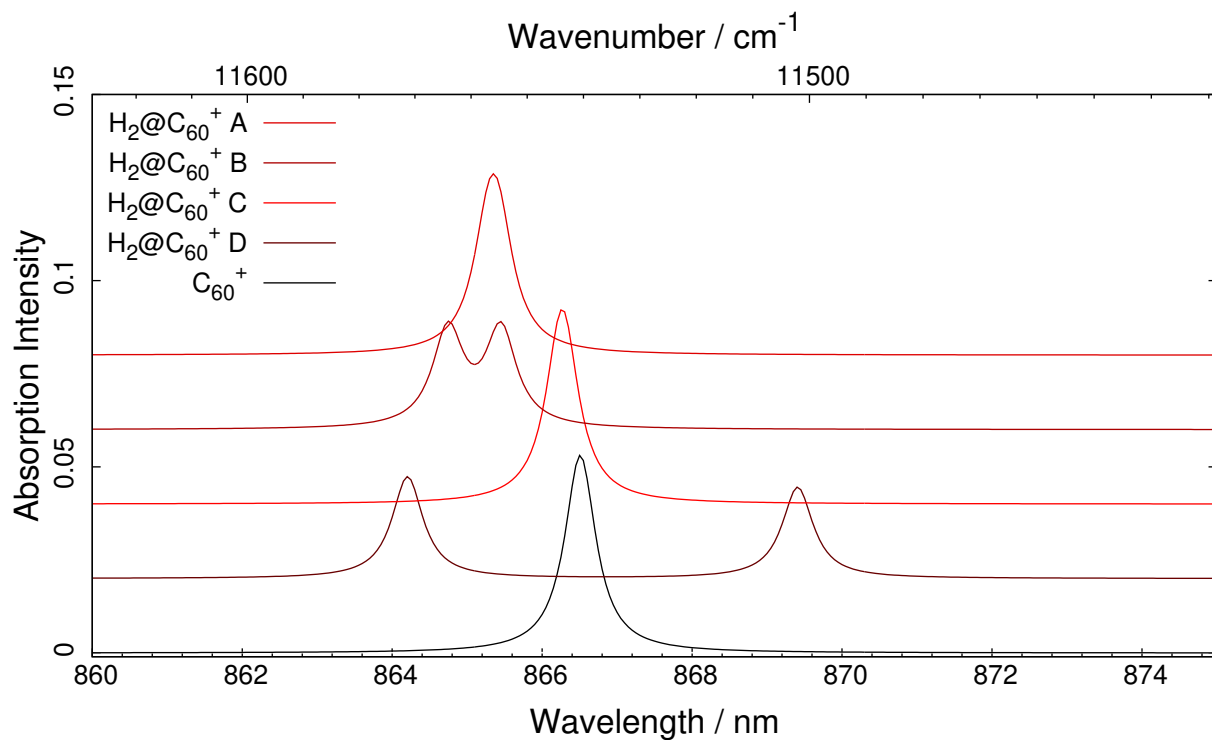

Figure S4: Calculated 0-0 vertical electronic transitions, corresponding to the  $C_{60}^+ {}^2E_{1g} \leftarrow {}^2A_{1u}$  absorption (TDDFT BP86/def2-SVP)<sup>4</sup> for the same  $H_2@C_{60}^+$  isomers as in Fig. S3. The calculated spectrum was broadened by Lorentzian functions with a 0.5 nm FWHM: oscillator strength  $\times$  Lorentzian function. Most of the calculated absorption wavelengths show a blue shift relative to the  $C_{60}^+$  absorption, which is also observed in the experiment.

## References

- (1) Campbell, E. K.; Maier, J. P. Isomeric and Isotopic Effects on the Electronic Spectrum of C60+-He: Consequences for Astronomical Observations of C60+. *Astrophys. J.* **2018**, *858*, 36.
- (2) Campbell, E. K.; Holz, M.; Maier, J. P.; Gerlich, D.; Walker, G. A. H.; Bohlender, D. Gas Phase Absorption Spectroscopy of C<sub>60</sub><sup>+</sup> and C<sub>70</sub><sup>+</sup> in a Cryogenic Ion Trap: Comparison with Astronomical Measurements. *Astrophys. J.* **2016**, *822*, 17.
- (3) Rohatgi, A. WebPlotDigitizer. <https://automeris.io/WebPlotDigitizer>, Version: 4.1, E-Mail: ankitrohatgi@hotmail.com, Location: Austin, Texas, USA.
- (4) TURBOMOLE V6.4 2012, a development of University of Karlsruhe and Forschungszentrum Karlsruhe GmbH, 1989-2007, TURBOMOLE GmbH, since 2007; available from <http://www.turbomole.com>.
